# Supplementary material for: Nigella sativa Extract Potentially Inhibited Methicillin Resistant Staphylococcus aureus Induced Infection in Rabbits: Potential Immunomodulatory and Growth Promoting Properties
Source: MDPI journal article supplement (doi:10.3390/ani12192635), 2022-09-30
Supplement: s1 [file s1]

**Supplementary Table S1.** Antimicrobial resistance patterns of MRSA isolates from animal and human origins

| Antimicrobial/resistance pattern | No. of MRSA isolates from different origins (%) |            | Total (23) |
|----------------------------------|-------------------------------------------------|------------|------------|
|                                  | Animal (9)                                      | Human (14) |            |
| Methicillin                      | 9 (100)                                         | 14 (100)   | 23 (100)   |
| Erythromycin                     | 2 (22.2)                                        | 6 (42.9)   | 8 (34.8)   |
| Doxycycline                      | 3 (33.3)                                        | 5 (35.7)   | 8 (34.8)   |
| Clindamycin                      | 2 (22.2)                                        | 4 (28.6)   | 6 (26.1)   |
| Amoxicillin/clavulanic acid      | 6 (66.7)                                        | 5 (35.7)   | 11 (47.8)  |
| Sulfamethoxazole/trimethoprim    | 1 (11.1)                                        | 8 (57.1)   | 9 (39.1)   |
| Ciprofloxacin                    | 3 (33.3)                                        | 5 (35.7)   | 8 (34.8)   |
| Rifampicin                       | 2 (22.2)                                        | 3 (21.4)   | 5 (21.7)   |
| Gentamicin                       | 0 (0)                                           | 1 (7.1)    | 1 (4.3)    |
| Multidrug resistance pattern     | 5 (55.6)                                        | 8 (57.1)   | 13 (56.5)  |
